# Supplementary material for: Preparation and characterization of silver film coated ZnO nanowire gas sensors based on the infrared surface enhancement effect for detection of VOCs
Source: Royal Society of Chemistry journal article supplement (doi:10.1039/c3ra40494c), 2013-03-29
Supplement: c3ra40494c.pdf [file c3ra40494c.pdf]

1 **Electronic Supplementary Information for:**  
2 **Preparation and Characterization of Silver Film Coated ZnO**  
3 **Nanowires Gas Sensors Based on Infrared Surface Enhancement**  
4 **Effect in Detection of VOCs**

5 Elumalai Satheeskumar\* and Jyisy Yang

6 Department of Chemistry,

7 *National Chung-Hsing University, Taichung 402, Taiwan*

8

9

10 **1. EDX spectra of ZnO nanowires and Ag/ZnO nanowires**

11 *2.1 ZnO nanowires*

12

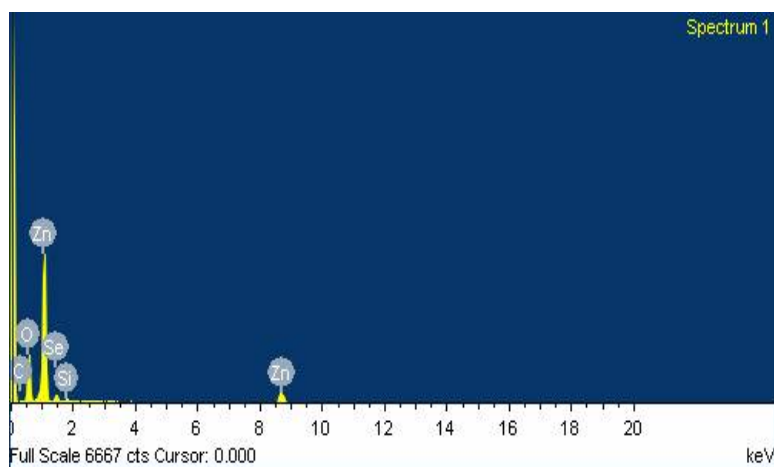

13

14

15

16

17

18

19 2.2 Ag/ZnO nanowires

20 Ag film was prepared by ZnO nanowires treated with Pd<sup>2.0</sup>Ag<sup>15,4</sup>

21

22

23

24

25

26

27

28

29

30

31

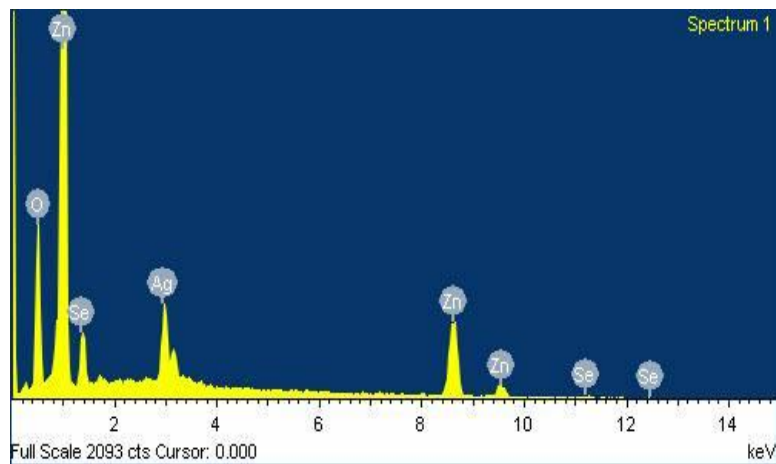

32

33

34

35

36

37

38

39

40

41

42

43

44

45

46

47

48

49

50

51

52

53

54
